# Supplementary material for: Crystal-field regulation enables broadband-to-line emission switching in Cr3+-activated pyroxenes
Source: Royal Society of Chemistry journal article supplement (doi:10.1039/d3tc04124g), 2024-01-01
Supplement: d3tc04124g1.pdf [file d3tc04124g1.pdf]

## Crystal-Field Regulation Enables Broadband-to-Line Emission Switching in Cr<sup>3+</sup>-Activated Pyroxenes

Yingying Ma,<sup>a</sup> Ting Wen,<sup>\*a</sup> Ke Liu,<sup>a</sup> Chen Li,<sup>a</sup> Dequan Jiang,<sup>b</sup> En Chen,<sup>a</sup> Tianyao Pei,<sup>a</sup> Chuanlong Lin,<sup>a</sup> and Yonggang Wang<sup>\*b,a</sup>

<sup>a</sup>Center for High Pressure Science and Technology Advanced Research (HPSTAR), Beijing 100193, China

<sup>b</sup>School of Materials Science and Engineering, Peking University, Beijing 100871, China

\*E-mail: ting.wen@hpstar.ac.cn

\*E-mail: ygw@pku.edu.cn

**Figure S1.** PL spectra of (a, b) LiScSi<sub>2</sub>O<sub>6</sub>:0.04Cr<sup>3+</sup> and (d, e) LiScGe<sub>2</sub>O<sub>6</sub>:0.04Cr<sup>3+</sup> under compression and decompression. The intensity of <sup>2</sup>E→<sup>4</sup>A<sub>2</sub> transition under HP, <sup>4</sup>T<sub>2</sub>→<sup>4</sup>A<sub>2</sub> transition at 0.3 GPa and after release of (c) LiScSi<sub>2</sub>O<sub>6</sub>:0.04Cr<sup>3+</sup> and (f) LiScGe<sub>2</sub>O<sub>6</sub>:0.04Cr<sup>3+</sup>. The pressure-dependent <sup>2</sup>E→<sup>4</sup>A<sub>2</sub> transition of (g) LiScSi<sub>2</sub>O<sub>6</sub>:0.04Cr<sup>3+</sup>, (h) LiScGe<sub>2</sub>O<sub>6</sub>:0.04Cr<sup>3+</sup> (i) ruby under HP. (j) The comparative analysis of PL spectra of LiScSi<sub>2</sub>O<sub>6</sub>:0.04Cr<sup>3+</sup>, LiScGe<sub>2</sub>O<sub>6</sub>:0.04Cr<sup>3+</sup> and ruby at 16.0 GPa and 22.0 GPa.

**Figure S2.** Diagram of the bond lengths and bond angles of ScO<sub>6</sub> in (a) C2/c and (b) P2<sub>1</sub>/c phases. The calculated Sc-O distances and O-Sc-O angles as a function of pressure in (c, d) LiScSi<sub>2</sub>O<sub>6</sub> and (e, f) LiScGe<sub>2</sub>O<sub>6</sub>.

**Figure S3.** Partial enlargements of (a) *in situ* HP XRD pattern and (b) Lattice volume of LiScSi<sub>2</sub>O<sub>6</sub>. β angle of (c) LiScSi<sub>2</sub>O<sub>6</sub> and (d) LiScGe<sub>2</sub>O<sub>6</sub> as a function of pressure.

**Figure S4.** LeBail fitting results of (a) LiScSi<sub>2</sub>O<sub>6</sub> at 0.4 GPa, 3.0 GPa, 24.1 GPa and (b) LiScGe<sub>2</sub>O<sub>6</sub> at 1.1 GPa, 20.3 GPa.

**Figure S5.** PL spectra of (a) LiScSi<sub>2</sub>O<sub>6</sub>:0.02Eu<sup>3+</sup> and (b) LiScGe<sub>2</sub>O<sub>6</sub>:0.02Eu<sup>3+</sup> measured at 80 K and 300 K.

**Figure S6.** Crystal structures of (a) LiScSi<sub>2</sub>O<sub>6</sub> and (b) LiScGe<sub>2</sub>O<sub>6</sub>. The twist angles of (c) SiO<sub>4</sub> tetrahedra chains in LiScSi<sub>2</sub>O<sub>6</sub> and (d) GeO<sub>4</sub> tetrahedra chains in LiScGe<sub>2</sub>O<sub>6</sub>.

**Table S1.** Energy level transition and crystal field strength ( $D_q/B$ ) of Some Cr<sup>3+</sup> activated Phosphors at ambient conditions.

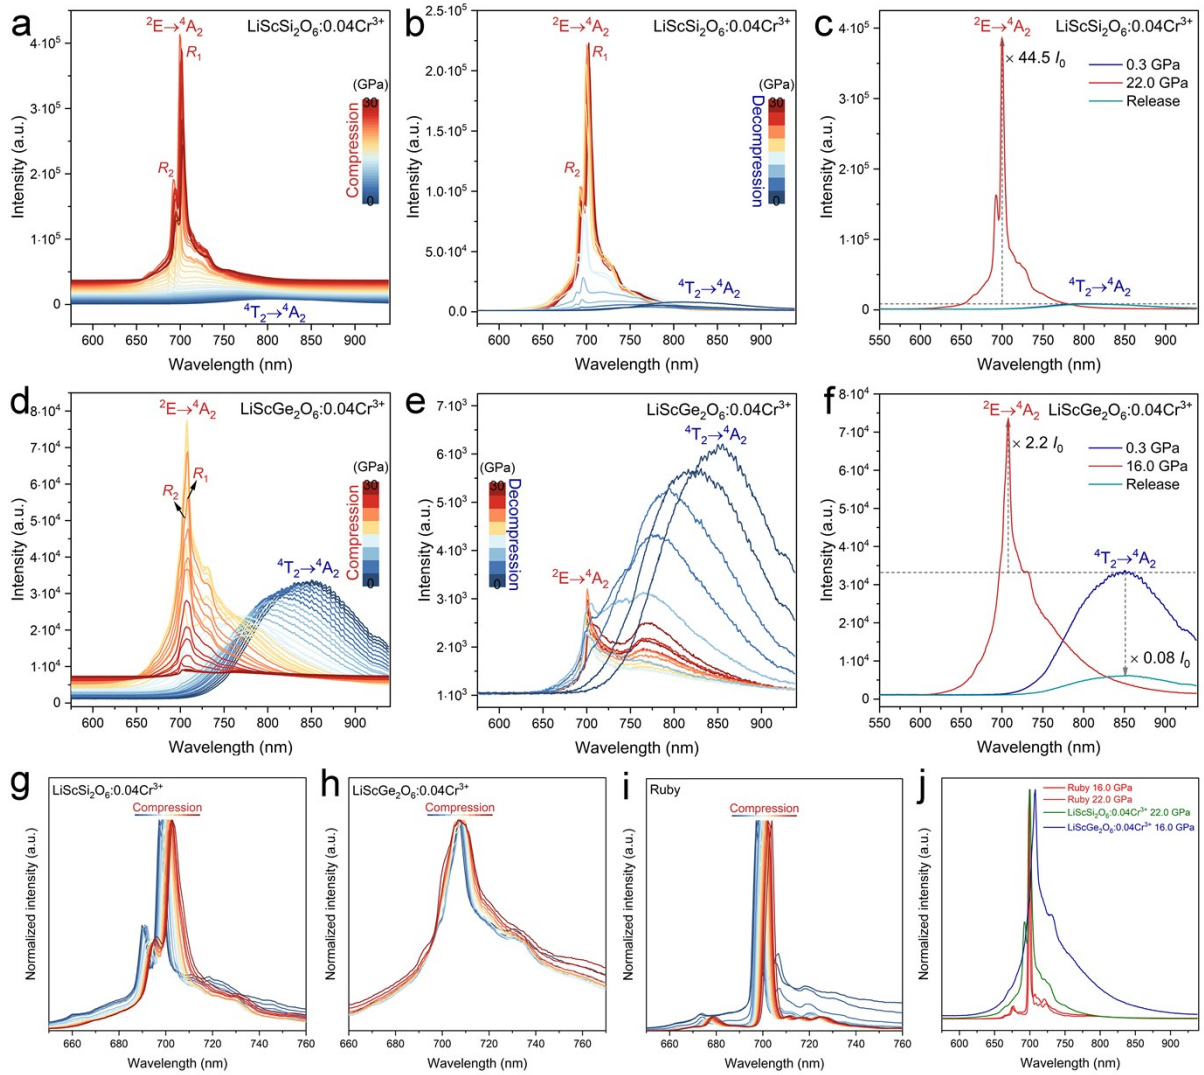

**Figure S1.** PL spectra of (a, b)  $\text{LiScSi}_2\text{O}_6:0.04\text{Cr}^{3+}$  and (d, e)  $\text{LiScGe}_2\text{O}_6:0.04\text{Cr}^{3+}$  under compression and decompression. The intensity of  ${}^2\text{E} \rightarrow {}^4\text{A}_2$  transition under HP,  ${}^4\text{T}_2 \rightarrow {}^4\text{A}_2$  transition at 0.3 GPa and after release of (c)  $\text{LiScSi}_2\text{O}_6:0.04\text{Cr}^{3+}$  and (f)  $\text{LiScGe}_2\text{O}_6:0.04\text{Cr}^{3+}$ . The pressure-dependent  ${}^2\text{E} \rightarrow {}^4\text{A}_2$  transition of (g)  $\text{LiScSi}_2\text{O}_6:0.04\text{Cr}^{3+}$ , (h)  $\text{LiScGe}_2\text{O}_6:0.04\text{Cr}^{3+}$  (i) ruby under HP. (j) The comparative analysis of PL spectra of  $\text{LiScSi}_2\text{O}_6:0.04\text{Cr}^{3+}$ ,  $\text{LiScGe}_2\text{O}_6:0.04\text{Cr}^{3+}$  and ruby at 16.0 GPa and 22.0 GPa.

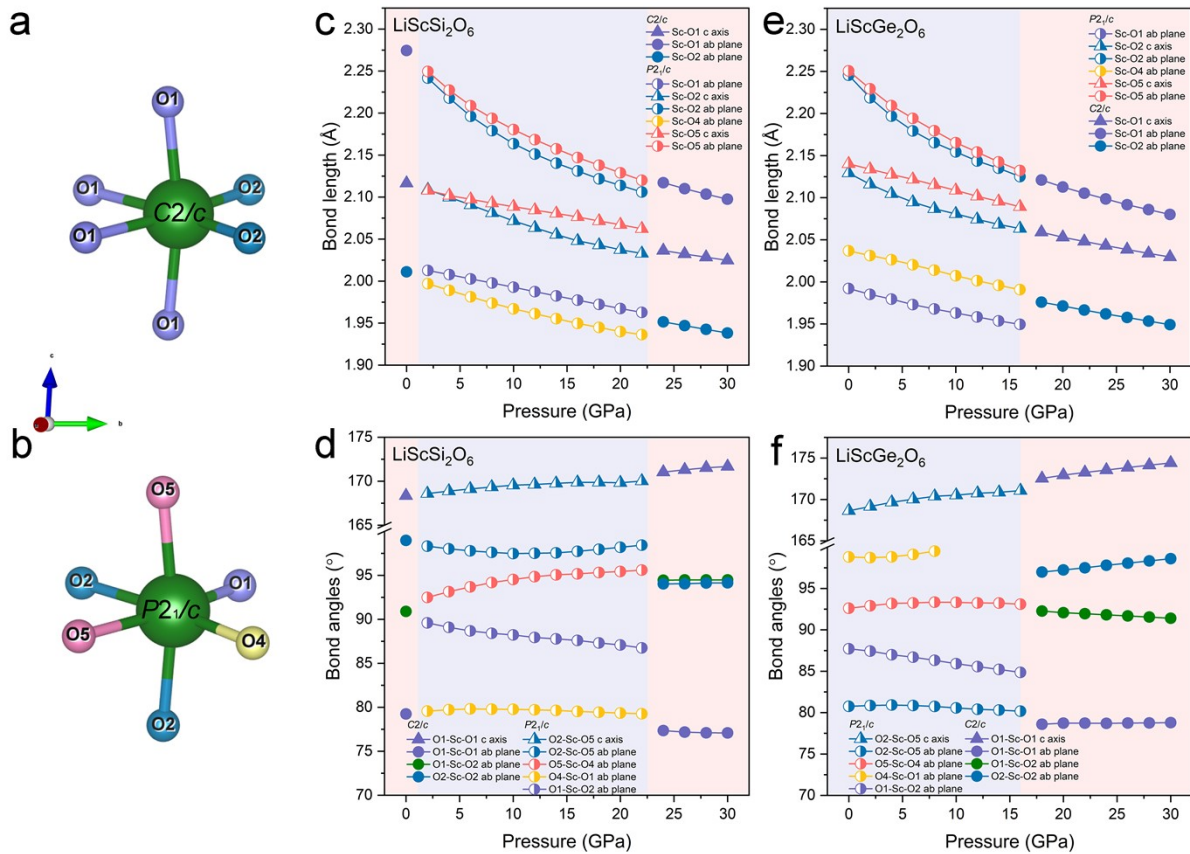

**Figure S2.** Diagram of the bond lengths and bond angles of ScO<sub>6</sub> in (a) C2/c and (b) P2<sub>1</sub>/c phases. The calculated Sc-O distances and O-Sc-O angles as a function of pressure in (c, d) LiScSi<sub>2</sub>O<sub>6</sub> and (e, f) LiScGe<sub>2</sub>O<sub>6</sub>.

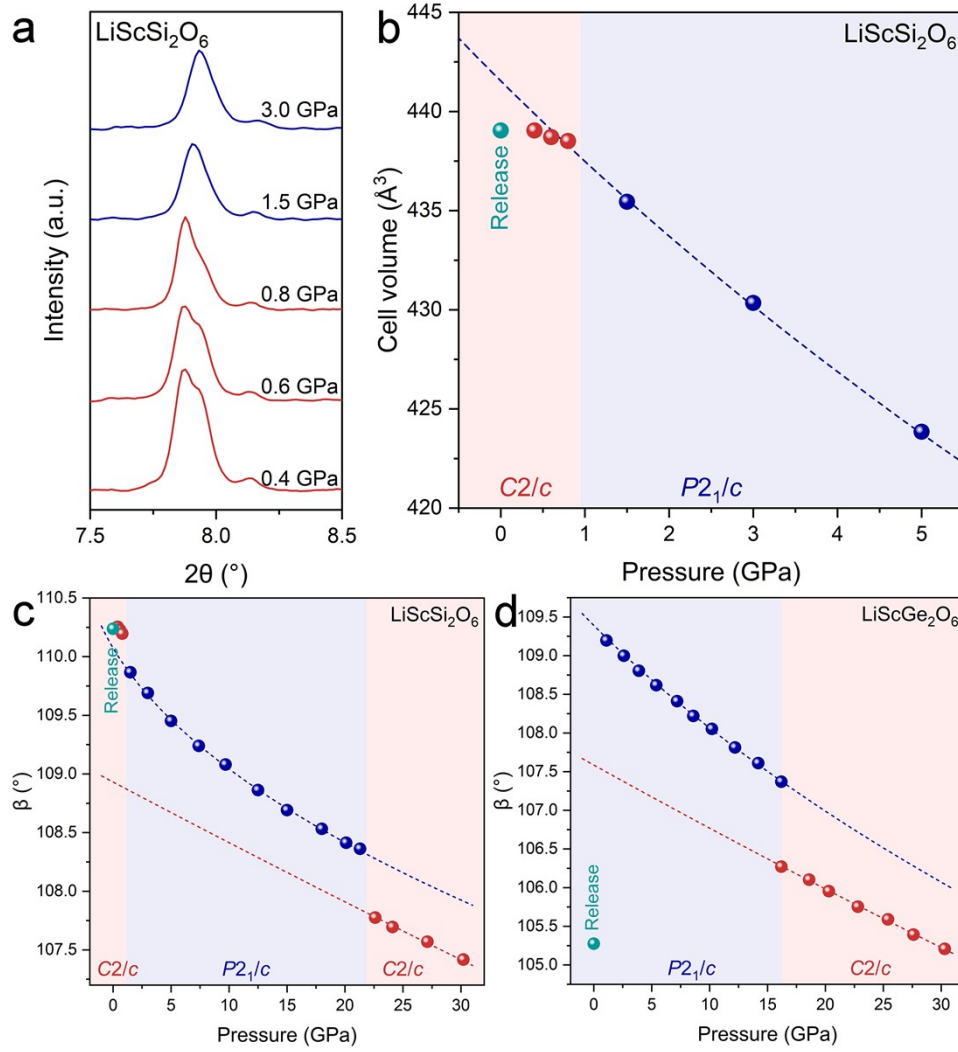

**Figure S3.** Partial enlargements of (a) *in situ* HP XRD pattern and (b) Lattice volume of  $\text{LiScSi}_2\text{O}_6$ ,  $\beta$  angle of (c)  $\text{LiScSi}_2\text{O}_6$  and (d)  $\text{LiScGe}_2\text{O}_6$  as a function of pressure.

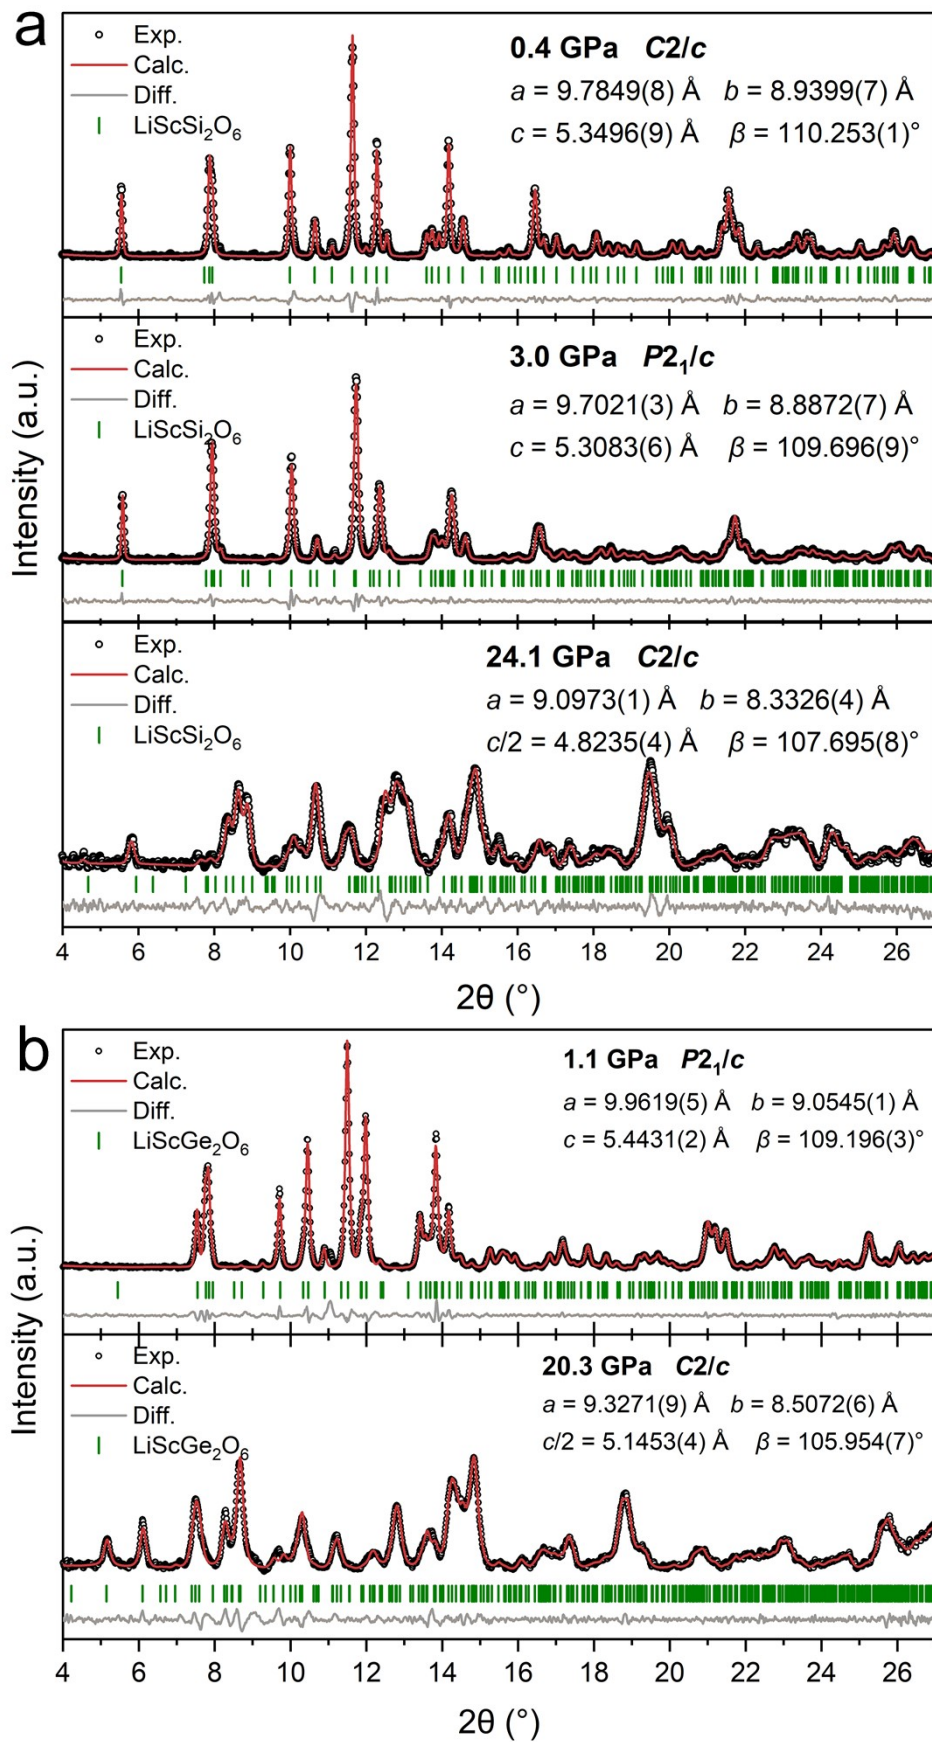

Figure S4. LeBail fitting results of (a) LiScSi<sub>2</sub>O<sub>6</sub> at 0.4 GPa, 3.0 GPa, 24.1 GPa and (b) LiScGe<sub>2</sub>O<sub>6</sub> at 1.1 GPa, 20.3 GPa.

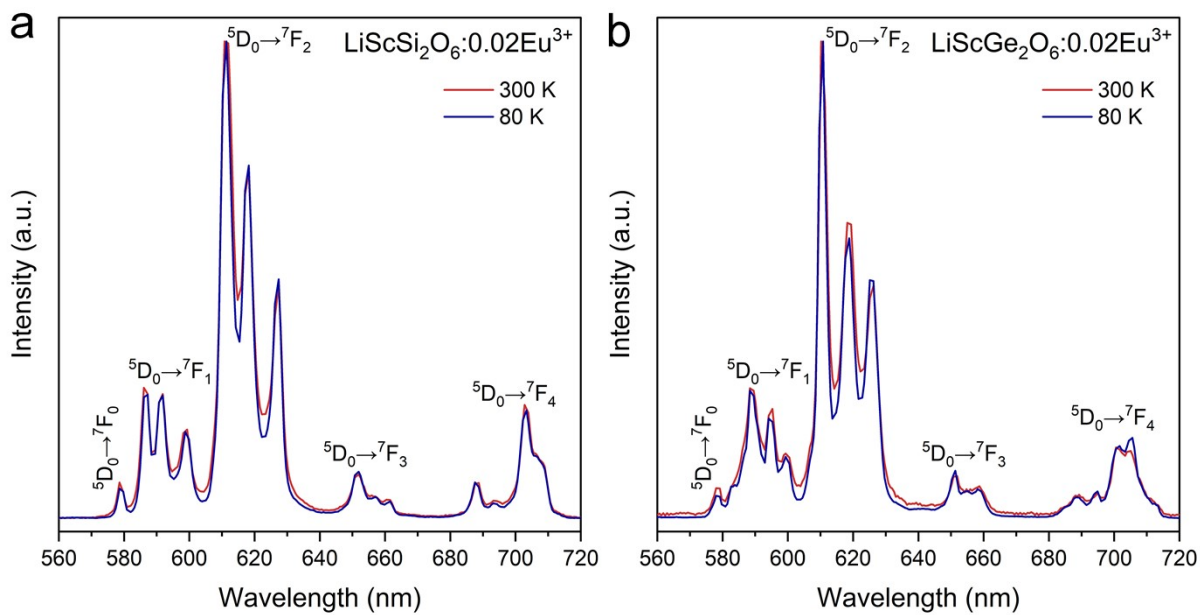

Figure S5. PL spectra of (a)  $\text{LiScSi}_2\text{O}_6:0.02\text{Eu}^{3+}$  and (b)  $\text{LiScGe}_2\text{O}_6:0.02\text{Eu}^{3+}$  measured at 80 K and 300 K.

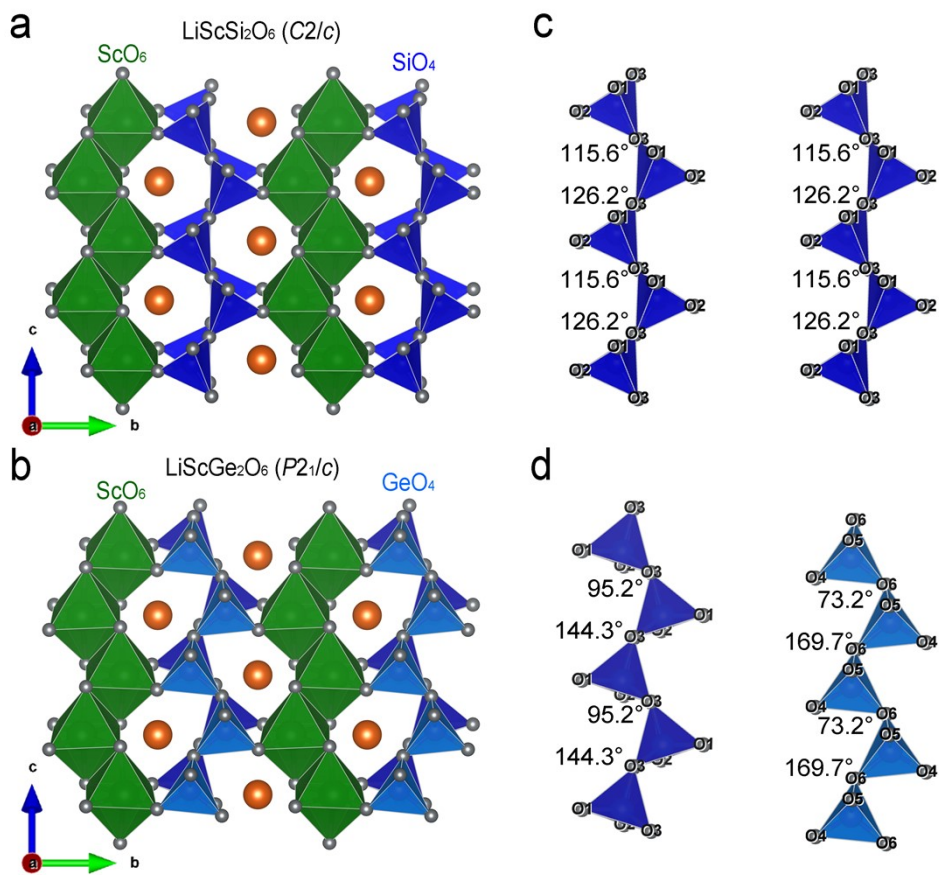

Figure S6. Crystal structures of (a)  $\text{LiScSi}_2\text{O}_6$  and (b)  $\text{LiScGe}_2\text{O}_6$ . The twist angles of (c)  $\text{SiO}_4$  tetrahedra chains in  $\text{LiScSi}_2\text{O}_6$  and (d)  $\text{GeO}_4$  tetrahedra chains in  $\text{LiScGe}_2\text{O}_6$ .

**Table S1.** Energy level transition and crystal field strength ( $D_q/B$ ) of Some Cr<sup>3+</sup> activated Phosphors at ambient conditions.

| Materials                                                                 | Cr sites                                               | $\lambda_{em}$ (nm)    | Transition                                                                | $D_q/B$                                           |
|---------------------------------------------------------------------------|--------------------------------------------------------|------------------------|---------------------------------------------------------------------------|---------------------------------------------------|
| LiInGe <sub>2</sub> O <sub>6</sub> :Cr                                    | InO <sub>6</sub>                                       | 880                    | <sup>4</sup> T <sub>2</sub> → <sup>4</sup> A <sub>2</sub>                 | 1.66                                              |
| LiInSi <sub>2</sub> O <sub>6</sub> :Cr                                    | InO <sub>6</sub>                                       | 840                    | <sup>4</sup> T <sub>2</sub> → <sup>4</sup> A <sub>2</sub>                 | 1.75                                              |
| InBO <sub>3</sub> :Cr                                                     | InO <sub>6</sub>                                       | 820                    | <sup>4</sup> T <sub>2</sub> → <sup>4</sup> A <sub>2</sub>                 | 1.78                                              |
| LiScP <sub>2</sub> O <sub>7</sub> :Cr                                     | ScO <sub>6</sub>                                       | 880                    | <sup>4</sup> T <sub>2</sub> → <sup>4</sup> A <sub>2</sub>                 | 1.84                                              |
| LiScSi <sub>2</sub> O <sub>6</sub> :Cr                                    | ScO <sub>6</sub>                                       | 850                    | <sup>4</sup> T <sub>2</sub> → <sup>4</sup> A <sub>2</sub>                 | 1.87                                              |
| NaInGe <sub>2</sub> O <sub>6</sub> :Cr                                    | InO <sub>6</sub>                                       | 900                    | <sup>4</sup> T <sub>2</sub> → <sup>4</sup> A <sub>2</sub>                 | 1.89                                              |
| LiScGe <sub>2</sub> O <sub>6</sub> :Cr                                    | ScO <sub>6</sub>                                       | 844-886                | <sup>4</sup> T <sub>2</sub> → <sup>4</sup> A <sub>2</sub>                 | 1.79-1.99                                         |
| Ca <sub>2</sub> LuZr <sub>2</sub> Al <sub>3</sub> O <sub>12</sub> :Cr     | CaO <sub>8</sub> , LuO <sub>8</sub> , ZrO <sub>6</sub> | 650-850                | <sup>4</sup> T <sub>2</sub> → <sup>4</sup> A <sub>2</sub>                 | Cr1 1.92<br>Cr2 2.38                              |
| Sr <sub>2</sub> ScSbO <sub>6</sub> :Cr                                    | ScO <sub>6</sub>                                       | 890                    | <sup>4</sup> T <sub>2</sub> → <sup>4</sup> A <sub>2</sub>                 | 2.03                                              |
| LiInP <sub>2</sub> O <sub>7</sub> :Cr                                     | InO <sub>6</sub>                                       | 860                    | <sup>4</sup> T <sub>2</sub> → <sup>4</sup> A <sub>2</sub>                 | 2.09                                              |
| CaMgGe <sub>2</sub> O <sub>6</sub> :Cr                                    | MgO <sub>6</sub>                                       | 845                    | <sup>4</sup> T <sub>2</sub> → <sup>4</sup> A <sub>2</sub>                 | 2.12                                              |
| ScBO <sub>3</sub> :Cr                                                     | ScO <sub>6</sub>                                       | 800                    | <sup>4</sup> T <sub>2</sub> → <sup>4</sup> A <sub>2</sub>                 | 2.15                                              |
| Sr <sub>9</sub> Ga(PO <sub>4</sub> ) <sub>7</sub> :Cr                     | GaO <sub>6</sub>                                       | 850                    | <sup>4</sup> T <sub>2</sub> → <sup>4</sup> A <sub>2</sub>                 | 2.24                                              |
| GaTaO <sub>4</sub> :Cr                                                    | GaO <sub>6</sub>                                       | 840                    | <sup>4</sup> T <sub>2</sub> → <sup>4</sup> A <sub>2</sub>                 | 2.29                                              |
| Bi <sub>2</sub> Ga <sub>4</sub> O <sub>9</sub> :Cr                        | GaO <sub>6</sub>                                       | 800                    | <sup>4</sup> T <sub>2</sub> , <sup>2</sup> E→ <sup>4</sup> A <sub>2</sub> | 2.31                                              |
| Ba <sub>3</sub> Sc <sub>4</sub> O <sub>9</sub> :Cr                        | ScO <sub>6</sub>                                       | 835                    | <sup>4</sup> T <sub>2</sub> → <sup>4</sup> A <sub>2</sub>                 | Cr1 2.42<br>Cr2 2.40                              |
| [EA] <sub>2</sub> NaCr <sub>x</sub> Al <sub>1-x</sub> (HCOO) <sub>6</sub> | AlO <sub>6</sub>                                       | 684.4, 686.4,<br>752.3 | <sup>4</sup> T <sub>2</sub> , <sup>2</sup> E→ <sup>4</sup> A <sub>2</sub> | 2.76-2.33                                         |
| La <sub>2</sub> MgZrO <sub>6</sub> :Cr                                    | MgO <sub>6</sub> , ZrO <sub>6</sub>                    | 740, 760, 825          | <sup>2</sup> E, <sup>4</sup> T <sub>2</sub> → <sup>4</sup> A <sub>2</sub> | 2.53<br>2.49                                      |
| Al <sub>2</sub> O <sub>3</sub> :Cr                                        | AlO <sub>6</sub>                                       | 694.28                 | <sup>2</sup> E→ <sup>4</sup> A <sub>2</sub>                               | 2.81                                              |
| LaGaO <sub>3</sub> :Cr                                                    | GaO <sub>6</sub>                                       | 739                    | <sup>2</sup> E→ <sup>4</sup> A <sub>2</sub>                               | 2.89                                              |
| Zn <sub>2-x</sub> Al <sub>2x</sub> Sn <sub>1-x</sub> O <sub>4</sub> :Cr   | AlO <sub>6</sub>                                       | 800-722                | <sup>4</sup> T <sub>2</sub> → <sup>4</sup> A <sub>2</sub>                 | 2.292-3.066                                       |
| BaAl <sub>4</sub> Sb <sub>2</sub> O <sub>12</sub> :Cr                     | AlO <sub>6</sub> , SbO <sub>6</sub>                    | 695, 710, 750          | <sup>2</sup> E→ <sup>4</sup> A <sub>2</sub>                               | [SbO <sub>6</sub> ]2.6<br>[AlO <sub>6</sub> ] 2.9 |
| Y <sub>3</sub> Al <sub>5-x</sub> Ga <sub>x</sub> O <sub>12</sub> :<br>Cr  | AlO <sub>6</sub> , GaO <sub>6</sub>                    | 688-691                | <sup>2</sup> E→ <sup>4</sup> A <sub>2</sub>                               | 2.998-3.048                                       |
